# Supplementary material for: Bleeding Risk Prediction in Patients Treated with Antithrombotic Drugs According to the Anatomic Site of Bleeding, Indication for Treatment, and Time Since Treatment Initiation
Source: PubMed Central journal article supplement (PMC10948265; doi:10.1055/a-2259-1134), 2024-03-18
Supplement: 10-1055-a-2259-1134-s23110047.pdf [file 10-1055-a-2259-1134-s23110047.pdf]

**Supplementary Table S1** Summary of design of trials from which data were drawn

| Trial         | Study population                       | Study design | Intervention (s)                                                     | Control             | N       | Median follow-up |
|---------------|----------------------------------------|--------------|----------------------------------------------------------------------|---------------------|---------|------------------|
| RE-LY         | Atrial fibrillation                    | RCT          | Dabigatran 150 mg bid;<br>Dabigatran 110 mg bid                      | VKA                 | 18, 113 | 2.0 y            |
| AVERROES      | Atrial fibrillation                    | RCT          | Apixaban 5 mg bid (2.5 mg bid in certain patients)                   | ASA 81–324 mg daily | 5,599   | 1.1 y            |
| COMPASS       | Coronary and peripheral artery disease | RCT          | Rivaroxaban 2.5 mg bid and ASA 100 mg daily;<br>Rivaroxaban 5 mg bid | ASA 100 mg daily    | 27, 395 | 1.9 y            |
| NAVIGATE ESUS | Embolic stroke of undetermined source  | RCT          | Rivaroxaban 15 mg daily                                              | ASA 100 mg daily    | 7,213   | 1.1 y            |

Abbreviations: ASA, acetyl salicylic acid; AVERROES, Apixaban Versus Acetylsalicylic Acid to Prevent Stroke in Atrial Fibrillation Patients Who Have Failed or Are Unsuitable for Vitamin K Antagonist Treatment; COMPASS, Cardiovascular Outcomes for People Using Anticoagulation Strategies; NAVIGATE ESUS, New Approach Rivaroxaban Inhibition of Factor Xa in a Global Trial versus ASA to Prevent Embolism in Embolic Stroke of Undetermined Source; RCT, randomized controlled trial; RE-LY, Randomized Evaluation of Long-Term Anticoagulation Therapy; VKA, vitamin K antagonist.

**Supplementary Table S2** Baseline variables reported in the trials

| Variable                                                               | COMPASS | NAVIGATE | RE-LY | AVERROES |
|------------------------------------------------------------------------|---------|----------|-------|----------|
| Demographics                                                           |         |          |       |          |
| Sex                                                                    | x       | x        | x     | x        |
| Age                                                                    | x       | x        | x     | x        |
| Ethnicity/race (Asian, black/African American, white/Caucasian, other) | x       | x        | x     | x        |
| Baseline physical measurements                                         |         |          |       |          |
| Systolic blood pressure                                                | x       | x        | x     | x        |
| Diastolic blood pressure                                               | x       | x        | x     | x        |
| Heart rate                                                             | x       | x        | x     | x        |
| Weight                                                                 | x       | x        | x     | x        |
| Height                                                                 | x       | x        | x     | x        |
| Hip circumference                                                      | x       |          | x     | x        |
| Waist circumference                                                    | x       |          | x     | x        |
| Baseline laboratory tests                                              |         |          |       |          |
| Creatinine                                                             | x       | x        | x     | x        |
| Blood urea nitrogen                                                    |         |          | x     |          |
| Hemoglobin                                                             | x       | x        | x     | x        |
| Platelets                                                              | x       | x        | x     | x        |
| Leukocytes                                                             | x       | x        | x     | x        |
| Aspartate aminotransferase                                             | x       | x        | x     | x        |
| Alanine aminotransferase                                               |         | x        | x     | x        |
| Alkaline phosphatase                                                   |         | x        | x     | x        |
| Total bilirubin                                                        |         | x        | x     | x        |
| Direct bilirubin                                                       |         | x        |       |          |
| Sodium                                                                 |         |          | x     |          |
| Potassium                                                              |         |          | x     |          |
| Chloride                                                               |         |          | x     |          |
| Phosphorus                                                             |         |          | x     |          |
| Protein                                                                |         |          | x     |          |

**Supplementary Table S2** (Continued)

| Variable                                  | COMPASS | NAVIGATE | RE-LY | AVERROES |
|-------------------------------------------|---------|----------|-------|----------|
| Albumin                                   |         |          | x     |          |
| Lactate dehydrogenase                     |         |          | x     |          |
| Urate                                     |         |          | x     |          |
| Total cholesterol                         |         |          | x     |          |
| Triglycerides                             |         |          | x     |          |
| Electrocardiogram                         |         |          | x     | x        |
| Baseline concomitant medications          |         |          |       |          |
| Aspirin                                   | x       | x        | x     | x        |
| Clopidogrel                               | x       | x        | x     | x        |
| Prasugrel                                 | x       | x        |       |          |
| Ticagrelor                                | x       | x        |       |          |
| Ticlopidine                               | x       | x        | x     | x        |
| Dipyridamole                              | x       | x        | x     | x        |
| Other antiplatelet                        | x       | x        | x     | x        |
| Parenteral anticoagulant                  | x       | x        | x     | x        |
| Rivaroxaban                               | x       | x        |       |          |
| Apixaban                                  | x       | x        |       |          |
| Dabigatran                                | x       | x        |       |          |
| Edoxaban                                  |         | x        |       |          |
| Warfarin/vitamin K antagonist             | x       | x        | x     | X        |
| Other anticoagulant                       | x       | x        |       |          |
| Angiotensin receptor blocker              | x       | x        | x     | x        |
| ACE inhibitor                             | x       | x        | x     | x        |
| Diuretic                                  | x       | x        | x     | x        |
| Alpha blocker or other vasodilator        | x       | x        | x     | x        |
| Calcium channel blocker                   | x       | x        | x     | x        |
| Beta blocker                              | x       | x        | x     | x        |
| Statin                                    | x       | x        | x     | x        |
| Nonstatin lipid-lowering agent            |         |          | x     | x        |
| COXII inhibitor                           |         |          | x     | x        |
| Other nonsteroidal anti-inflammatory drug | x       | x        | x     | x        |
| Insulin                                   | x       | x        | x     | x        |
| Oral hypoglycemic                         | x       | x        | x     | x        |
| Proton pump inhibitor                     | x       | x        | x     | x        |
| H2 blocker                                |         |          | x     | x        |
| Digoxin                                   |         |          | x     | x        |
| Amiodarone                                |         |          | x     | x        |
| Other antiarrhythmic                      |         |          | x     | x        |
| Selective serotonin reuptake inhibitor    | x       |          |       | x        |
| Vitamins                                  |         |          | x     |          |
| Herbal remedies                           |         |          | x     |          |
| Antibiotics                               |         |          | x     |          |

(Continued)

**Supplementary Table S2** (Continued)

| Variable                                                                | COMPASS | NAVIGATE | RE-LY | AVERROES |
|-------------------------------------------------------------------------|---------|----------|-------|----------|
| Questionnaires/assessments                                              |         |          |       |          |
| International Physical Activity Questionnaire                           | x       |          |       |          |
| Self-Administered Gerocognitive Exam                                    | x       | x        |       |          |
| Digit symbol substitution task                                          | x       |          |       | x        |
| Montreal cognitive assessment                                           | x       | x        |       | x        |
| EuroQol 5D questionnaire                                                | x       | x        | x     | x        |
| Trail-making test                                                       |         |          |       | x        |
| 1-minute semantic fluency (animal naming)                               |         |          |       | x        |
| Medical history                                                         |         |          |       |          |
| Stroke                                                                  | x       | x        | x     | x        |
| Territory of qualifying stroke                                          |         | x        |       |          |
| Treatment of qualifying stroke                                          |         | x        |       |          |
| Severity of qualifying stroke (modified Rankin Scale, NIH stroke scale) |         | x        |       |          |
| Transient ischemic attack                                               | x       | x        | x     | x        |
| Systemic embolism (non-CNS)                                             |         |          | x     |          |
| Hypertension                                                            | x       | x        | x     | x        |
| Diabetes mellitus                                                       | x       | x        | x     | x        |
| Heart failure                                                           | x       | x        | x     | x        |
| Coronary artery disease                                                 | x       | x        | x     |          |
| Myocardial infarction                                                   | x       | x        | x     |          |
| Angina—stable or unstable                                               | x       |          |       |          |
| Coronary atherectomy or percutaneous coronary intervention              | x       | x        |       |          |
| Coronary artery bypass grafting                                         | x       | x        |       |          |
| Carotid endarterectomy or stent                                         |         | x        |       |          |
| Other cardiac arrhythmia                                                |         |          | x     |          |
| Valvular heart disease                                                  |         |          | x     |          |
| Peripheral artery disease                                               | x       | x        |       | x        |
| Peripheral artery bypass surgery                                        | x       |          |       |          |
| Percutaneous angioplasty                                                | x       |          |       |          |
| Limb or foot amputation                                                 | x       |          |       |          |
| Intermittent claudication                                               | x       |          |       |          |
| Asymptomatic carotid stenosis >50% or revascularization                 | x       |          |       |          |
| Aortic aneurysm                                                         | x       |          |       |          |
| Bioprosthetic heart valve present                                       |         | x        |       |          |
| Permanent pacemaker or implantable cardiac defibrillator present        |         | x        | x     | x        |
| Venous thromboembolism                                                  |         | x        |       |          |
| Hyperlipidemia                                                          |         | x        |       |          |
| Tobacco use (current, former, and never)                                | x       | x        | x     | x        |
| Alcohol—more than five drinks per week                                  | x       |          | x     | x        |
| Cancer and site of primary                                              | x       | x        | x     | x        |
| Bleeding requiring transfusion and site                                 | x       | x        |       |          |
| Prior vitamin K antagonist use                                          |         |          | x     | x        |
| Bleeding while on oral anticoagulation                                  |         |          | x     | x        |

**Supplementary Table S2** (Continued)

| Variable                                                                  | COMPASS | NAVIGATE | RE-LY | AVERROES |
|---------------------------------------------------------------------------|---------|----------|-------|----------|
| Difficulty with INR control                                               |         |          | x     | x        |
| Surgical history associated with gastrointestinal disease                 | x       |          |       |          |
| Peptic ulcer                                                              | x       |          |       |          |
| Diverticulitis                                                            | x       |          |       |          |
| Inflammatory bowel disease                                                | x       |          |       |          |
| <i>H. pylori</i>                                                          | x       |          |       |          |
| Hemorrhoids                                                               | x       |          |       | x        |
| Daily or occasional nosebleeds                                            |         |          |       | x        |
| Liver disease                                                             | x       | x        |       |          |
| Gilbert syndrome                                                          |         |          | x     | x        |
| History of fainting, falling, or fractures                                |         |          | x     | x        |
| History of seizures                                                       |         |          | x     |          |
| Ejection fraction                                                         | x       | x        | x     | x        |
| Qualifying atrial fibrillation episode                                    |         |          | x     | x        |
| Type of atrial fibrillation (permanent, paroxysmal, and persistent)       |         |          | x     | x        |
| Previous ablation                                                         |         |          | x     | x        |
| Previous cardioversion                                                    |         |          | x     | x        |
| Reasons why vitamin K antagonist is unsuitable                            |         |          |       | x        |
| <b>Social factors</b>                                                     |         |          |       |          |
| Health care costs (paid by self, public insurance, and private insurance) | x       |          |       |          |
| Driving status                                                            | x       | x        |       |          |
| Employment status                                                         |         |          | x     | x        |
| Live alone                                                                |         |          |       | x        |
| <12 y formal education                                                    | x       | x        |       | x        |

Abbreviations: ACE, angiotensin-converting enzyme; AVERROES, Apixaban Versus Acetylsalicylic Acid to Prevent Stroke in Atrial Fibrillation Patients Who Have Failed or Are Unsuitable for Vitamin K Antagonist Treatment; CNS, central nervous system; COMPASS, Cardiovascular Outcomes for People Using Anticoagulation Strategies; INR, international normalized ratio; NAVIGATE ESUS, New Approach Rivaroxaban Inhibition of Factor Xa in a Global Trial versus ASA to Prevent Embolism in Embolic Stroke of Undetermined Source; NIH, National Institutes of Health; RCT, randomized controlled trial; RE-LY, Randomized Evaluation of Long-Term Anticoagulation Therapy.

Note: x indicates variable collected in trial.

**Supplementary Table S3** Number of patients with bleeding events per trial

| First major bleeding event | COMPASS (N = 27,359) |     | RE-LY (N = 17,713) |     | NAVIGATE-ESUS (N = 7,195) |     | AVERROES (N = 5,546) |     | Total (N = 57,813) |     |
|----------------------------|----------------------|-----|--------------------|-----|---------------------------|-----|----------------------|-----|--------------------|-----|
|                            | N                    | %/y | N                  | %/y | N                         | %/y | N                    | %/y | N                  | %/y |
| Any major bleeding         | 688                  | 1.3 | 1100               | 3.3 | 83                        | 1.2 | 77                   | 1.1 | 1,948              | 2.0 |
| Intracranial bleeding      | 94                   | 0.2 | 128                | 0.4 | 30                        | 0.4 | 22                   | 0.3 | 274                | 0.3 |
| Major GI bleeding          | 272                  | 0.5 | 393                | 1.1 | 30                        | 0.4 | 22                   | 0.3 | 717                | 0.7 |

Abbreviations: AVERROES, Apixaban Versus Acetylsalicylic Acid to Prevent Stroke in Atrial Fibrillation Patients Who Have Failed or Are Unsuitable for Vitamin K Antagonist Treatment; COMPASS, Cardiovascular Outcomes for People Using Anticoagulation Strategies; ESUS, embolic stroke of undetermined source; GI, gastrointestinal; NAVIGATE ESUS, New Approach Rivaroxaban Inhibition of Factor Xa in a Global Trial versus ASA to Prevent Embolism in Embolic Stroke of Undetermined Source; RE-LY, Randomized Evaluation of Long-Term Anticoagulation Therapy.

**Supplementary Table S4** Univariate analysis: Hazard ratios (95% confidence intervals) of variables for major bleeding, major GI bleeding, intracranial hemorrhage, and non-GI, nonintracranial bleeding

|                                                  | Major bleeding   |         | Major GIB        |         | ICH              |         |
|--------------------------------------------------|------------------|---------|------------------|---------|------------------|---------|
|                                                  | Hazard ratio     | p-Value | Hazard ratio     | p-Value | Hazard ratio     | p-Value |
| Treatment arm (vs. aspirin alone)                |                  |         |                  |         |                  |         |
| Warfarin                                         | 1.83 (1.30–2.57) | 0.0005  | 0.90 (0.50–1.62) | 0.72    | 5.11 (2.64–9.92) | <0.0001 |
| DOAC, therapeutic dose                           | 1.55 (1.13–2.13) | 0.007   | 1.17 (0.68–2.02) | 0.57    | 1.60 (0.92–2.81) | 0.1     |
| Rivaroxaban alone                                | 1.56 (1.27–1.90) | <0.0001 | 1.66 (1.18–2.34) | 0.003   | 1.50 (0.91–2.47) | 0.11    |
| Rivaroxaban + aspirin                            | 1.78 (1.47–2.17) | <0.0001 | 2.47 (1.79–3.40) | <0.0001 | 1.11 (0.65–1.88) | 0.7     |
| Age (per 10 y increase)                          | 1.72 (1.62–1.82) | <0.0001 | 1.98 (1.79–2.19) | <0.0001 | 1.66 (1.42–1.93) | <0.0001 |
| Female                                           | 0.94 (0.85–1.03) | 0.19    | 0.92 (0.78–1.09) | 0.33    | 0.88 (0.67–1.14) | 0.33    |
| Race                                             |                  |         |                  |         |                  |         |
| Caucasian                                        | 1.11 (1.00–1.22) | 0.04    | 0.95 (0.81–1.11) | 0.51    | 0.67 (0.53–0.86) | 0.001   |
| Asian                                            | 0.96 (0.85–1.09) | 0.53    | 1.02 (0.83–1.24) | 0.86    | 2.02 (1.56–2.64) | <0.0001 |
| Black                                            | 1.43 (0.97–2.10) | 0.07    | 1.63 (0.90–2.95) | 0.11    | 1.51 (0.56–4.05) | 0.41    |
| Other                                            | 0.85 (0.74–0.97) | 0.01    | 1.02 (0.84–1.25) | 0.81    | 0.75 (0.52–1.08) | 0.12    |
| Weight (per 10kg increase)                       | 0.98 (0.95–1.00) | 0.07    | 0.95 (0.92–1.00) | 0.03    | 0.85 (0.79–0.91) | <0.0001 |
| Height (per 10cm increase)                       | 0.99 (0.94–1.03) | 0.55    | 0.96 (0.89–1.03) | 0.27    | 0.94 (0.84–1.06) | 0.34    |
| BMI (per 10 units increase)                      | 0.92 (0.85–1.00) | 0.06    | 0.85 (0.74–0.99) | 0.03    | 0.53 (0.41–0.68) | <0.0001 |
| Baseline diastolic BP (per 10 units increase)    | 0.81 (0.78–0.85) | <0.0001 | 0.72 (0.67–0.78) | <0.0001 | 1.06 (0.94–1.18) | 0.35    |
| Baseline systolic BP (per 10 units increase)     | 1.00 (0.97–1.02) | 0.87    | 0.97 (0.93–1.01) | 0.2     | 1.04 (0.97–1.11) | 0.3     |
| Pulse pressure (per 10 units increase)           | 1.11 (1.07–1.14) | <0.0001 | 1.13 (1.07–1.18) | <0.0001 | 1.02 (0.94–1.11) | 0.56    |
| Heart rate (per 10 units increase)               | 0.98 (0.95–1.02) | 0.3     | 0.98 (0.93–1.04) | 0.51    | 0.97 (0.88–1.06) | 0.46    |
| Creatinine (per 10 μmol/L increase)              | 1.11 (1.09–1.14) | <0.0001 | 1.13 (1.09–1.17) | <0.0001 | 1.03 (0.96–1.12) | 0.39    |
| GFR (per 10 mL/min/1.73 m <sup>3</sup> increase) | 0.86 (0.84–0.88) | <0.0001 | 0.82 (0.79–0.85) | <0.0001 | 0.86 (0.81–0.91) | <0.0001 |
| Medical history                                  |                  |         |                  |         |                  |         |
| Previous PAD                                     | 1.31 (1.14–1.51) | 0.0001  | 1.30 (1.04–1.63) | 0.02    | 0.76 (0.49–1.18) | 0.21    |
| Previous stroke                                  | 1.15 (0.99–1.33) | 0.07    | 0.95 (0.73–1.24) | 0.73    | 2.39 (1.76–3.26) | <0.0001 |
| Previous TIA                                     | 1.16 (0.98–1.37) | 0.09    | 1.18 (0.89–1.56) | 0.26    | 1.06 (0.65–1.72) | 0.81    |
| HTN history                                      | 1.22 (1.09–1.37) | 0.0006  | 1.25 (1.03–1.51) | 0.02    | 1.18 (0.88–1.60) | 0.27    |
| Previous MI                                      | 1.20 (1.07–1.33) | 0.001   | 1.33 (1.12–1.59) | 0.001   | 1.06 (0.78–1.43) | 0.72    |
| Previous HF                                      | 1.02 (0.93–1.13) | 0.65    | 1.21 (1.03–1.42) | 0.02    | 0.86 (0.64–1.15) | 0.32    |
| Coronary artery disease                          | 1.47 (1.31–1.65) | <0.0001 | 1.63 (1.35–1.97) | <0.0001 | 1.07 (0.77–1.48) | 0.7     |
| Cancer                                           | 1.53 (1.34–1.75) | <0.0001 | 1.35 (1.07–1.70) | 0.01    | 1.35 (0.93–1.96) | 0.12    |

Supplementary Table S4 (Continued)

|                              | Major bleeding   |         | Major GIB        |         | ICH              |         |
|------------------------------|------------------|---------|------------------|---------|------------------|---------|
|                              | Hazard ratio     | p-Value | Hazard ratio     | p-Value | Hazard ratio     | p-Value |
| Diabetes                     | 1.18 (1.07–1.30) | 0.001   | 1.16 (0.99–1.37) | 0.06    | 0.96 (0.73–1.26) | 0.76    |
| Prerandomization medications |                  |         |                  |         |                  |         |
| Statin                       | 1.09 (0.99–1.21) | 0.09    | 1.16 (0.98–1.38) | 0.08    | 0.78 (0.60–1.03) | 0.08    |
| Antiplatelet or aspirin      | 1.42 (1.27–1.59) | <0.0001 | 1.39 (1.16–1.68) | 0.0004  | 1.32 (0.97–1.80) | 0.07    |
| Anticoagulant                | 1.11 (0.99–1.25) | 0.08    | 1.09 (0.90–1.33) | 0.37    | 1.19 (0.87–1.64) | 0.27    |
| PPI                          | 1.31 (1.18–1.46) | <0.0001 | 1.31 (1.11–1.56) | 0.002   | 1.26 (0.95–1.68) | 0.11    |
| NSAID                        | 1.32 (1.11–1.56) | 0.001   | 1.48 (1.14–1.93) | 0.004   | 1.31 (0.83–2.07) | 0.24    |
| ACE or ARB                   | 1.05 (0.96–1.16) | 0.28    | 1.12 (0.95–1.31) | 0.17    | 0.88 (0.69–1.13) | 0.33    |
| Beta blocker                 | 0.93 (0.85–1.03) | 0.16    | 0.91 (0.78–1.07) | 0.25    | 0.85 (0.66–1.10) | 0.22    |
| Calcium channel blocker      | 1.11 (1.01–1.22) | 0.03    | 1.08 (0.92–1.26) | 0.34    | 1.04 (0.80–1.35) | 0.76    |
| Diuretic                     | 0.86 (0.84–0.88) | <0.0001 | 0.82 (0.79–0.85) | <0.0001 | 0.87 (0.82–0.92) | <0.0001 |
| > 12 y education             | 0.93 (0.81–1.07) | 0.32    | 0.83 (0.66–1.04) | 0.1     | 1.00 (0.72–1.39) | 0.99    |
| Smoking (vs. never smoking)  |                  |         |                  |         |                  |         |
| Former                       | 1.37 (1.25–1.51) | <0.0001 | 1.47 (1.25–1.72) | <0.0001 | 1.18 (0.91–1.52) | 0.21    |
| Current                      | 1.09 (0.94–1.27) | 0.26    | 1.13 (0.88–1.46) | 0.33    | 1.01 (0.68–1.50) | 0.95    |
| > 5 drinks of alcohol/wk     | 0.98 (0.89–1.08) | 0.64    | 0.89 (0.76–1.05) | 0.16    | 0.99 (0.76–1.29) | 0.94    |

Abbreviations: ACE, angiotensin-converting enzyme; ARB, angiotensin II receptor blockers; BMI, body mass index; DOAC, direct oral anticoagulant; GFR, glomerular filtration rate; HF, Heart failure; HTN, hypertension; MI, myocardial infarction; NSAID, nonsteroidal anti-inflammatory drugs; PAD, peripheral artery disease; PPI, proton-pump inhibitors; TIA, transient ischemic attack.

Note: Univariate analysis by univariate Cox models. p-Values are from the Wald test used in the Cox models.

**TRIPOD Checklist:** Prediction Model Development

| Section/Topic                | Item | Checklist item                                                                                                                                                                                        | Page   |
|------------------------------|------|-------------------------------------------------------------------------------------------------------------------------------------------------------------------------------------------------------|--------|
| Title and abstract           |      |                                                                                                                                                                                                       |        |
| Title                        | 1    | Identify the study as developing and/or validating a multivariable prediction model, the target population, and the outcome to be predicted.                                                          | 1      |
| Abstract                     | 2    | Provide a summary of objectives, study design, setting, participants, sample size, predictors, outcome, statistical analysis, results, and conclusions.                                               | 2      |
| Introduction                 |      |                                                                                                                                                                                                       |        |
| Background and objectives    | 3a   | Explain the medical context (including whether diagnostic or prognostic) and rationale for developing or validating the multivariable prediction model, including references to existing models.      | 4      |
|                              | 3b   | Specify the objectives, including whether the study describes the development or validation of the model or both.                                                                                     | 4      |
| Methods                      |      |                                                                                                                                                                                                       |        |
| Source of data               | 4a   | Describe the study design or source of data (e.g., randomized trial, cohort, or registry data), separately for the development and validation data sets, if applicable.                               | 5      |
|                              | 4b   | Specify the key study dates, including start of accrual; end of accrual; and, if applicable, end of follow-up.                                                                                        | 5      |
| Participants                 | 5a   | Specify key elements of the study setting (e.g., primary care, secondary care, general population) including number and location of centres.                                                          | S1     |
|                              | 5b   | Describe eligibility criteria for participants.                                                                                                                                                       | S1     |
|                              | 5c   | Give details of treatments received, if relevant.                                                                                                                                                     | S1     |
| Outcome                      | 6a   | Clearly define the outcome that is predicted by the prediction model, including how and when assessed.                                                                                                | 5–7    |
|                              | 6b   | Report any actions to blind assessment of the outcome to be predicted.                                                                                                                                | 5–6    |
| Predictors                   | 7a   | Clearly define all predictors used in developing or validating the multivariable prediction model, including how and when they were measured.                                                         | 10–11  |
|                              | 7b   | Report any actions to blind assessment of predictors for the outcome and other predictors.                                                                                                            | 7-8    |
| Sample size                  | 8    | Explain how the study size was arrived at.                                                                                                                                                            | 5      |
| Missing data                 | 9    | Describe how missing data were handled (e.g., complete-case analysis, single imputation, multiple imputation) with details of any imputation method.                                                  | 8      |
| Statistical analysis methods | 10a  | Describe how predictors were handled in the analyses.                                                                                                                                                 | 7–8    |
|                              | 10b  | Specify type of model, all model-building procedures (including any predictor selection), and method for internal validation.                                                                         | 7–8    |
|                              | 10d  | Specify all measures used to assess model performance and, if relevant, to compare multiple models.                                                                                                   | 8–9    |
| Risk groups                  | 11   | Provide details on how risk groups were created, if done.                                                                                                                                             | n/a    |
| Results                      |      |                                                                                                                                                                                                       |        |
| Participants                 | 13a  | Describe the flow of participants through the study, including the number of participants with and without the outcome and, if applicable, a summary of the follow-up time. A diagram may be helpful. | S1,S9  |
|                              | 13b  | Describe the characteristics of the participants (basic demographics, clinical features, available predictors), including the number of participants with missing data for predictors and outcome.    | 23–26  |
| Model development            | 14a  | Specify the number of participants and outcome events in each analysis.                                                                                                                               | 23     |
|                              | 14b  | If done, report the unadjusted association between each candidate predictor and outcome.                                                                                                              | S10–16 |
| Model specification          | 15a  | Present the full prediction model to allow predictions for individuals (i.e., all regression coefficients, and model intercept or baseline survival at a given time point).                           | 27–29  |

**TRIPOD Checklist:** (Continued)

| Section/Topic             | Item | Checklist item                                                                                                                                     | Page  |
|---------------------------|------|----------------------------------------------------------------------------------------------------------------------------------------------------|-------|
|                           | 15b  | Explain how to use the prediction model.                                                                                                           | n/a   |
| Model performance         | 16   | Report performance measures (with CIs) for the prediction model.                                                                                   | 11–14 |
| Discussion                |      |                                                                                                                                                    |       |
| Limitations               | 18   | Discuss any limitations of the study (such as nonrepresentative sample, few events per predictor, missing data).                                   | 17–18 |
| Interpretation            | 19b  | Give an overall interpretation of the results, considering objectives, limitations, and results from similar studies, and other relevant evidence. | 15–18 |
| Implications              | 20   | Discuss the potential clinical use of the model and implications for future research.                                                              | 18    |
| Other information         |      |                                                                                                                                                    |       |
| Supplementary information | 21   | Provide information about the availability of supplementary resources, such as study protocol, Web calculator, and data sets.                      | n/a   |
| Funding                   | 22   | Give the source of funding and the role of the funders for the present study.                                                                      | 19    |

Abbreviation: CI, confidence interval.

Note: We recommend using the TRIPOD Checklist in conjunction with the TRIPOD Explanation and Elaboration document.
